# Supplementary material for: Construction of the lactate-sensing fibremats by confining sensor fluorescent protein of lactate inside nanofibers of the poly(HPMA/DAMA)/ADH-nylon 6 core–shell fibremat
Source: Royal Society of Chemistry journal article supplement (doi:10.1039/d3ra06108f), 2023-01-01
Supplement: d3ra06108f1.pdf [file d3ra06108f1.pdf]

## Construction of the lactase-sensing fibermats by encapsulating lactase-responsive fluorescent protein inside nanofibers of the poly(HPMA/DAMA)/ADH-nylon6 core-shell fibremat.

Yuna Kato<sup>†</sup>, Shuichi Iwata<sup>†</sup>, Yusuke Nasu<sup>‡</sup>, Akiko Obata<sup>†</sup>, Kenji Nagata<sup>†</sup>, Robert E. Campbell<sup>‡</sup>, and Toshihisa Mizuno<sup>†, §\*</sup>

<sup>†</sup>*Graduate School of Engineering, Nagoya Institute of Technology, Gokiso-cho Showa-ku, Nagoya, Aichi 466-8555, Japan*

<sup>‡</sup>*Department of Chemistry, School of Science, The University of Tokyo, Bunkyo-ku, Tokyo, 113-0033, Japan*

<sup>§</sup>*Department of Nanopharmaceutical Sciences, Graduate School of Engineering, Nagoya Institute of Technology, Gokiso-cho Showa-ku, Nagoya, Aichi 466-8555, Japan.*

### Supporting Information

**Fig. S1** 400 MHz <sup>1</sup>H-NMR spectrum of poly(HPMA/DAMA) in D<sub>2</sub>O.

**Fig. S2** The GPC chromatogram of poly(HPMA/DAMA) was obtained using DMF as the eluent, supplemented with LiBr (0.05 (w/v)%), and a flow rate of 0.3 mL/min.

**Fig. S3** The fractions obtained from the purification of eLACCO1.1 using Ni-affinity chromatography were analyzed by SDS-PAGE.

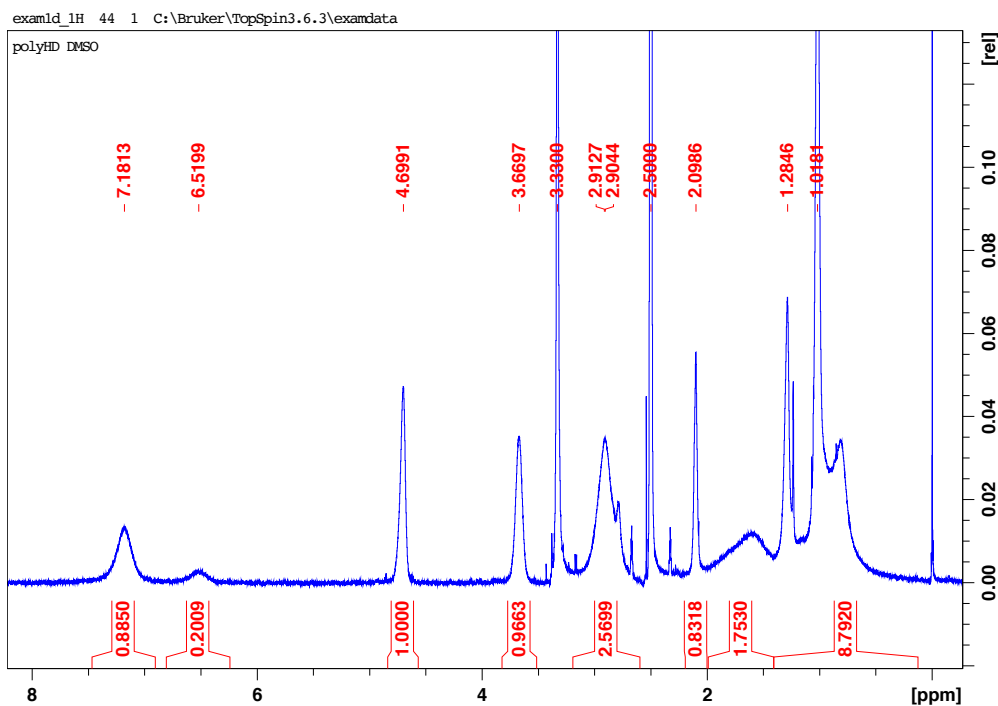

Fig. S1 400 MHz  $^1\text{H}$ -NMR spectrum of poly(HPMA/DAMA) in  $\text{D}_2\text{O}$ .

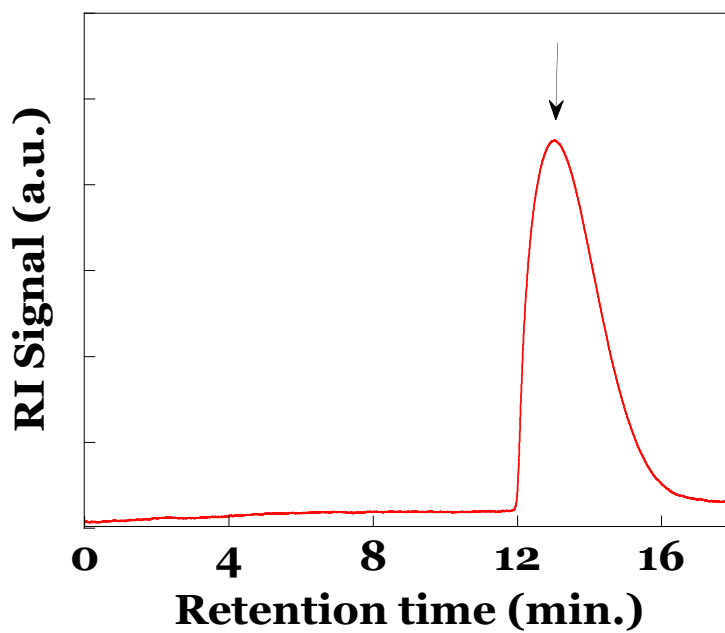

Fig. S2 The GPC chromatogram of poly(HPMA/DAMA) was obtained using DMF as the eluent, supplemented with LiBr (0.05 (w/v)%), and a flow rate of 0.3 mL/min.

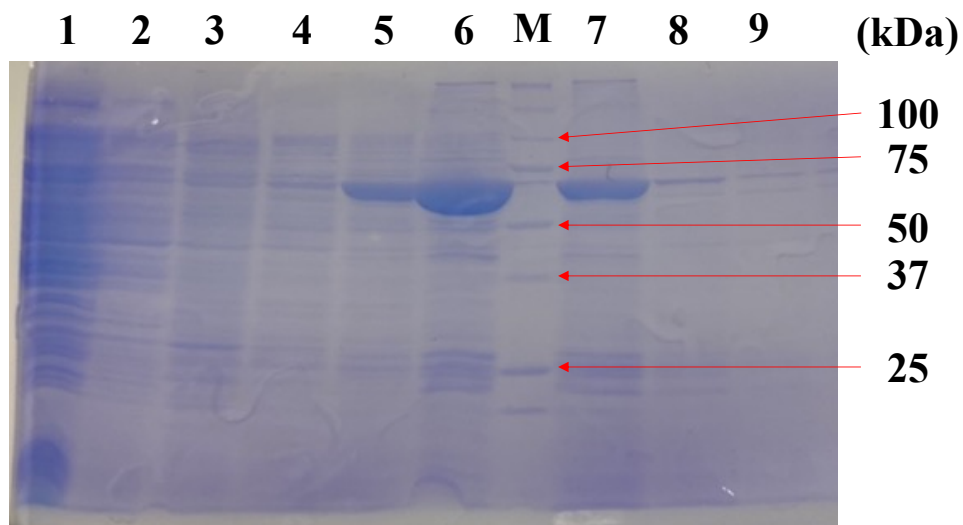

**Fig. S3** The fractions obtained from the purification of eLACCO1.1 using Ni-affinity chromatography were analyzed by SDS-PAGE. The analyzed fractions include the flow-through fraction (lane 1), the binding buffer fraction (lane 2), the wash buffer fraction (lane 3), the elution fractions (lane 4, 5, 6, 8, 9, and 10), and the molecular weight standard (lane 7).
